# Supplementary material for: MMR vaccination induces trained immunity via functional and metabolic reprogramming of γδ T cells
Source: JCI journal article supplement (doi:10.1172/jci170848), 2024-01-30
Supplement: sd1 [file 1]

**Supplementary materials for:**

**MMR vaccination induces a trained immunity program characterized by functional and metabolic reprogramming of  $\gamma\delta$  T cells**

5 Rutger J. Röring<sup>1,2†</sup>, Priya A. Debisarun<sup>1,2†</sup>, Javier Botey-Bataller<sup>1,2,3,4†</sup>, Tsz Kin Suen<sup>5</sup>, Özlem Bulut<sup>1,2</sup>, Gizem Kılıc<sup>1,2</sup>, Valerie A. C. M. Koeken<sup>1,2,3,4</sup>, Andrei Sarlea<sup>1</sup>, Harsh Bahrar<sup>1,2</sup>, Helga Dijkstra<sup>1,2</sup>, Heidi Lemmers<sup>1,2</sup>, Katharina L. Gössling<sup>6</sup>, Nadine Röchel<sup>6</sup>, Philipp N. Ostermann<sup>7</sup>, Lisa Müller<sup>7</sup>, Heiner Schaal<sup>7</sup>, Ortwin Adams<sup>7</sup>, Arndt Borkhardt<sup>6</sup>, Yavuz Ariyurek<sup>8</sup>, Emile J. de Meijer<sup>8</sup>, Susan Kloet<sup>8</sup>, Jaap ten Oever<sup>1,2</sup>, Katarzyna Placek<sup>4</sup>, Yang Li<sup>1,2,3,4</sup>, Mihai G. Netea<sup>1,2,5\*</sup>

10

† These authors contributed equally to this work.

\*Corresponding author:

Mihai G. Netea, MD, PhD

15 Department of Internal Medicine, Radboud University Nijmegen Medical Center

Tel: +31-24-3618819

E-mail: mihai.netea@radboudumc.nl

**This PDF file includes:**

20 Figs. S1 to S6

Tables S1 to S3

**Other Supplementary Materials for this manuscript include the following:**

Data S1 (Olink before and after MMR)

25

## Supplementary figures

30

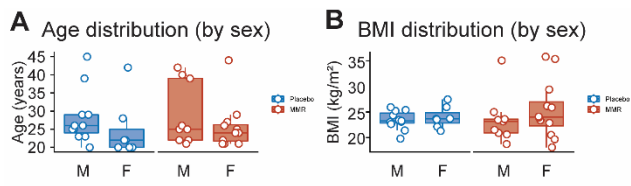

35

**Figure S1: Participant characteristics. (A)** Participant age, stratified by sex and treatment group. **(B)** Participant BMI, stratified by sex and treatment group.

40

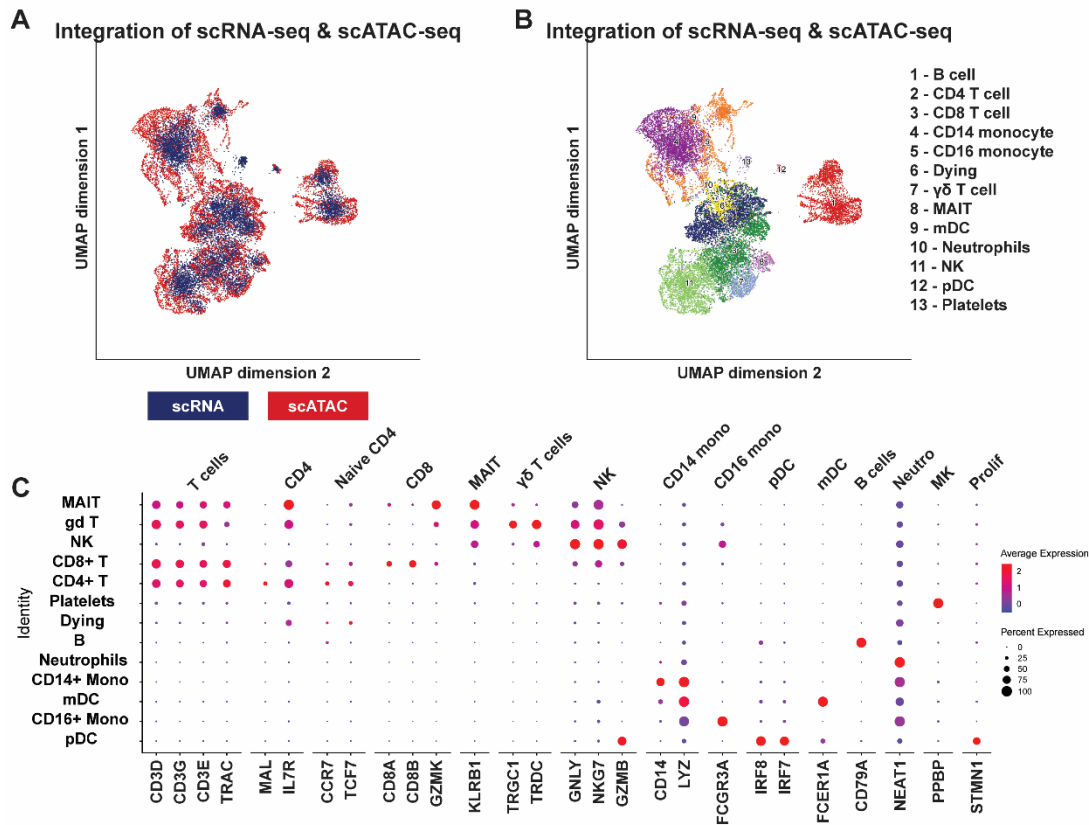

45

**Figure S2: Integration of scRNA and scATAC-sequencing data and cell-type annotation.** (A) UMAP of scRNA-seq and scATACseq integrated data. Integration was performed using canonical correlation analysis between gene expression values and gene score values calculated based on gene accessibility. (B) Same as before, colored by the different celltypes present. (C) Dotplot of markers used for celltype annotation.

50

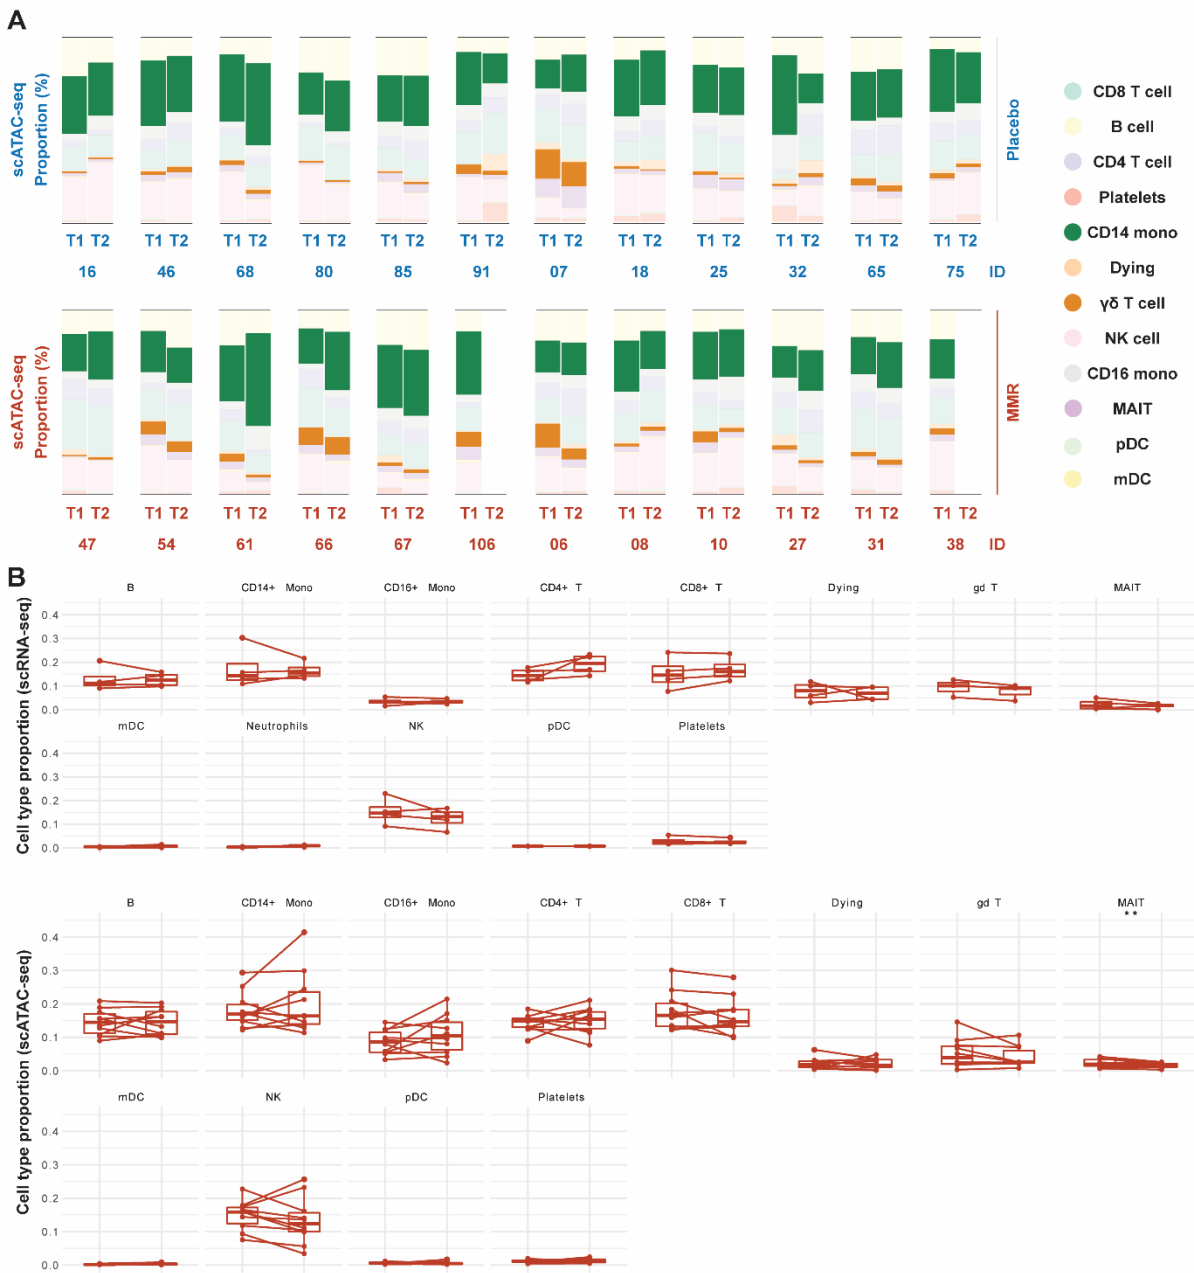

**Figure S3: Cell-type proportions before and after treatment. (A)** Proportions of cell types annotated according to the scATAC-seq data in placebo and MMR samples. **(B)** The same data, only displayed as boxplots per cell type to enable paired comparisons.

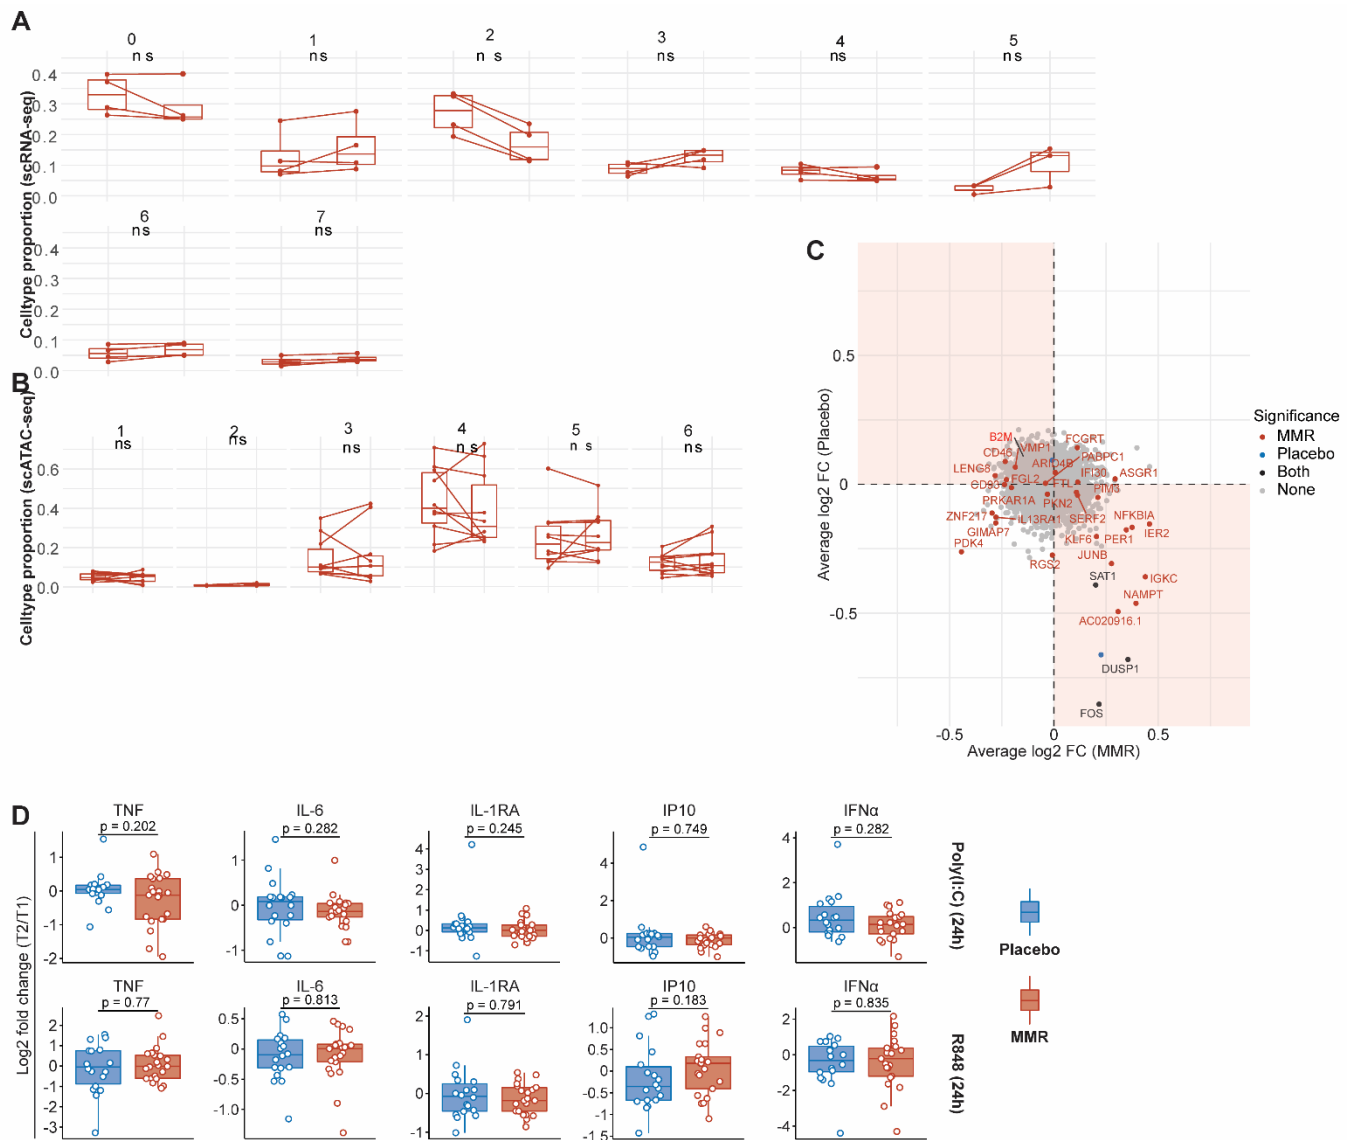

65 **Figure S4: Single-cell analysis of monocyte subpopulations and monocyte-associated cytokine production by PBMCs.** (A) Proportions of monocyte sub-populations (scRNA-seq) before and after MMR vaccination. (B) Proportions of monocyte sub-populations (scATAC-seq) before and after MMR vaccination. (C) Combined ‘volcano plot’ showing average log2 fold changes of monocyte gene expression between timepoints for both placebo and MMR. Bonferroni adjusted p-value < 0.05, paired test using MAST. (D) Monocyte-associated cytokines produced by PBMCs following diverse stimulations; the data are expressed as log2 fold-changes between baseline and one month after treatment.

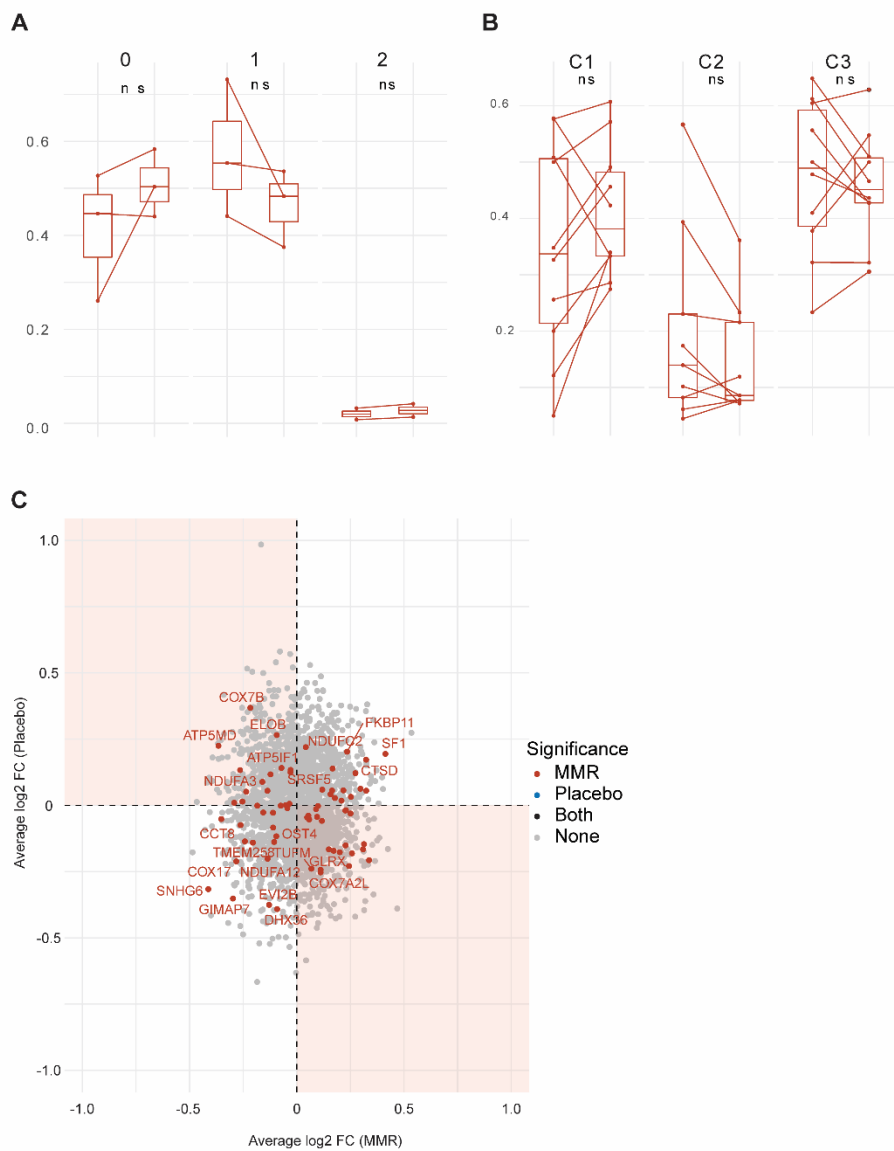

70

**Figure S5: Single-cell analysis of  $\gamma\delta$  T cell populations. (A)** Proportions of  $\gamma\delta$  T cell sub-populations (scRNA-seq) before and after MMR vaccination. **(B)** Proportions of  $\gamma\delta$  T cell sub-populations (scATAC-seq) before and after MMR vaccination. **(C)** Combined ‘volcano plot’ showing average log<sub>2</sub> fold changes of  $\gamma\delta$  T cell gene expression between timepoints for both placebo and MMR. Bonferroni adjusted p-value < 0.05, paired test using MAST.

75

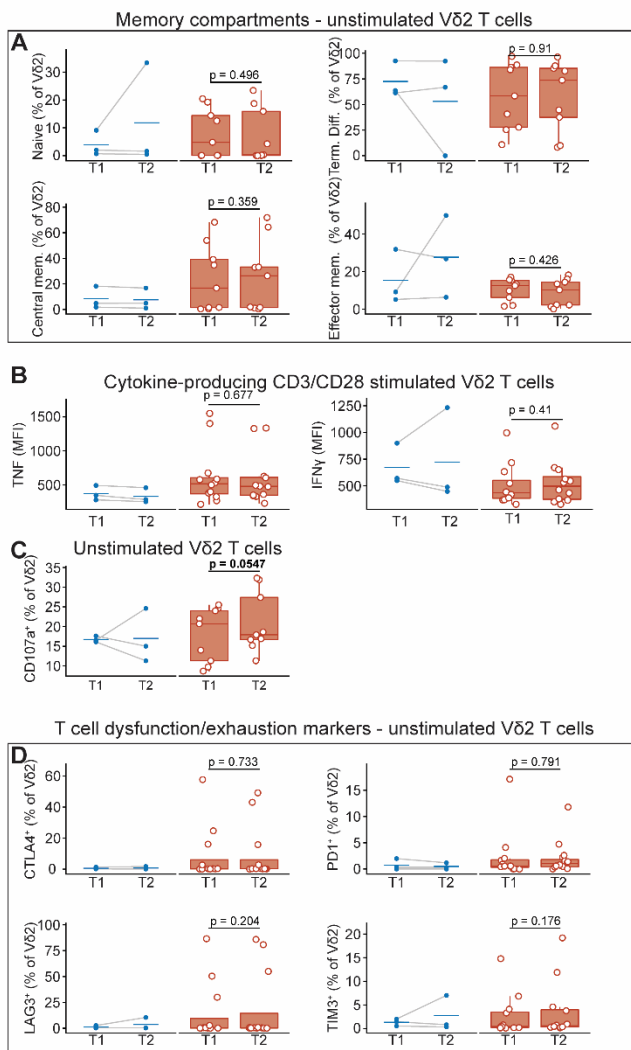

80 **Figure S6: characterization of Vδ2 cells following MMR vaccination.** (A) Proportions of memory compartments characterized by expression of CD27 and CD45RA. (B) Mean fluorescence intensities (MFI) of TNF and IFN $\gamma$  in stimulated Vδ2 T cells. (C) Percentage of unstimulated Vδ2 T cells that stain positive for CD107a, a marker of cytotoxic degranulation. (D) Proportions of Vδ2 T cells that stain positive for markers commonly associated with T cell dysfunction (CTLA4, PD1, TIM3, LAG3).

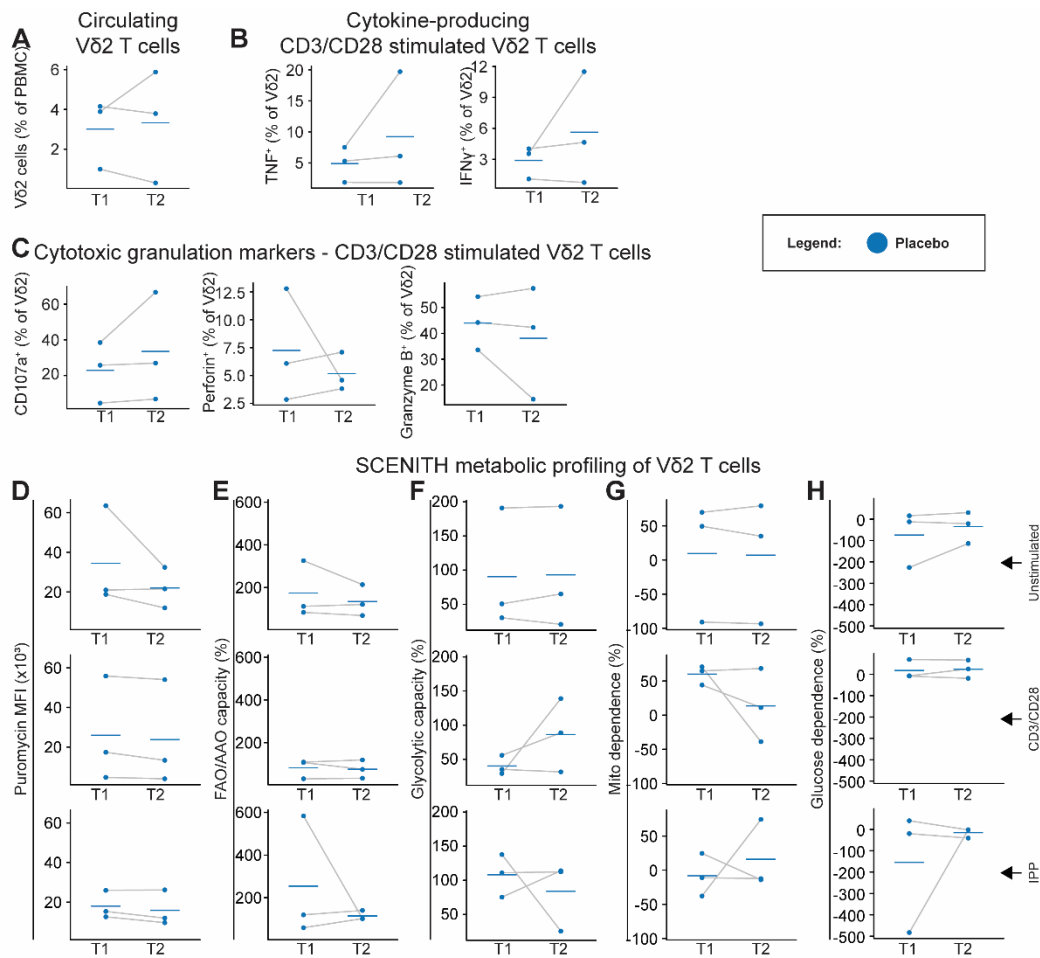

**Figure S7. Functional and metabolic characterization of Vδ2 cells following placebo vaccination.** (A) The percentage of Vδ2 T cells in isolated PBMCs. (B) The percentage of Vδ2 T cells that produce TNF or IFN $\gamma$  following CD3/CD28 stimulation. (C) The percentage of Vδ2 T cells expressing markers of cytotoxic granule release (CD107a, left) or production (Granzyme B and perforin, middle and right). (D) Puromycin incorporation, (E) FAO/AAO capacity, (F) Glycolytic capacity, (G) Mitochondrial dependence, (H) Glycolysis dependence. All parameters were measured by flow cytometry.



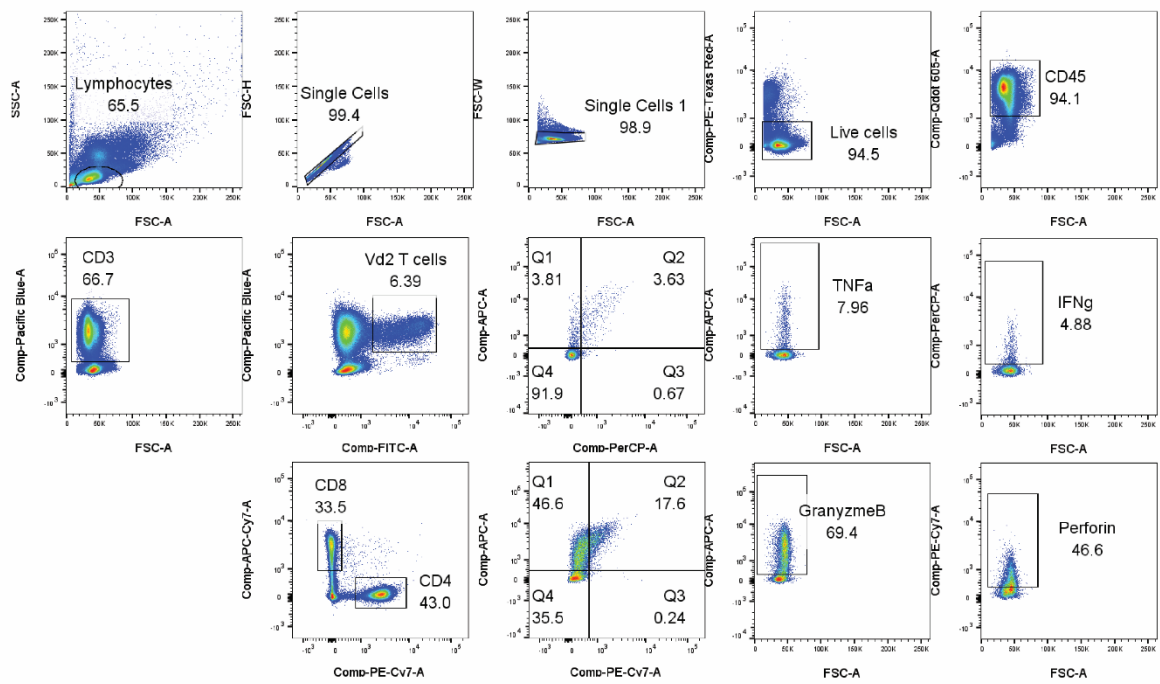

100 **Figure S8. Visual representation of the gating strategy used for flow cytometry analyses of Vδ2 T cells.** The gating strategy was as follows: events corresponding to lymphocyte size were selected based on FSC-A/SSC-A, followed by selection of single-cell events in subsequent FSC-H/FSC-A and FSC-W/FSC-A gates. Viable cells were selected by gating on viability-dye-negative cells. The subsequent analyses were all performed on CD45<sup>+</sup>CD3<sup>+</sup>Vδ2<sup>+</sup> cells.

## Supplementary tables

| Characteristic*        | Placebo<br>n = 18 | MMR<br>n = 21 | p-value† |
|------------------------|-------------------|---------------|----------|
| Sex, female            | 7 (38.89)         | 12 (57.14)    | 0.3406   |
| Sex, male              | 11 (61.11)        | 9 (42.86)     |          |
| Age, years             | 25 ± 7.63         | 25 ± 7.38     | 0.876    |
| BMI, kg/m <sup>2</sup> | 23.47 ± 1.89      | 23.45 ± 5.22  | 0.945    |

\* Median +/- SD for continuous variables and n (%) for categorical variables  
† Mann-Whitney U test for continuous variables and Fisher's exact test for categorical variables

Table S1: characteristics of the study population.

| Stimulus                                                                                         | Concentration<br>in experiment | Cat. No.  | Manufacturer                                                               |
|--------------------------------------------------------------------------------------------------|--------------------------------|-----------|----------------------------------------------------------------------------|
| <i>E. coli</i> LPS serotype O55:B5,<br>further purified as in (54)                               | 10 ng/ml                       | -         | Prepared in-house by<br>Heidi Lemmers,<br>Radboudumc                       |
| Heat-killed <i>S. aureus</i><br>ATCC 25923                                                       | 1 * 10 <sup>6</sup> CFU/ml     | -         | Cultured and heat-<br>killed in-house by Jelle<br>Gerretsen,<br>Radboudumc |
| Heat-killed <i>C. albicans</i> yeast,<br>UC820 (ATCC MYA-3573),<br>prepared as described in (55) | 1 * 10 <sup>6</sup> CFU/ml     | -         | Prepared in-house by<br>Diletta Rosati,<br>Radboudumc                      |
| Poly(I:C)                                                                                        | 10 µg/ml                       | tlrl-pic  | Invivogen                                                                  |
| R848                                                                                             | 3 µg/ml                        | tlrl-r848 | Invivogen                                                                  |
| Influenza A H1N1, prepared<br>according to the methods in<br>(56)                                | 3.3 * 10 <sup>5</sup> /ml      | -         | Kindly prepared by<br>KLG, NR, PNO, LM, HS,<br>OA, AB                      |
| SARS-CoV-2, prepared<br>according to the methods in<br>(56)                                      | 1.4 * 10 <sup>3</sup> /ml      | -         |                                                                            |

Table S2: Stimuli used to assess PBMC cytokine production capacity.

| Target     | Fluorophore                            | Clone    | Cat. No.    | Manufacturer  | Panel |
|------------|----------------------------------------|----------|-------------|---------------|-------|
| Viability  | Live-or-Dye Fixable Viability Stain    | -        | 32006       | Biotium       | 1     |
| CD3        | Pacific blue                           | UCHT1    | 300431      | Biolegend     | 1     |
| CD4        | PE-Cy7                                 | OKT4     | 317414      | Biolegend     | 1     |
| CD8        | APC-Cy7                                | SK1      | 344746      | Biolegend     | 1     |
| CD45       | BV605                                  | HI30     | 304042      | Biolegend     | 1     |
| Vδ2 TCR    | FITC                                   | REA771   | 130-111-009 | Miltenyi      | 1     |
| Vδ1 TCR    | PE                                     | REA173   | 130-120-440 | Miltenyi      | 1     |
| TNF        | APC                                    | MAb11    | 502912      | Biolegend     | 1     |
| IFNγ       | PerCP-Cy5.5                            | B27      | 560704      | BD Pharmingen | 1     |
|            |                                        |          |             |               |       |
| Viability  | Live/dead Fixable Aqua dead cell stain | -        | L34957      | Invitrogen    | 2     |
| CD3        | Pacific blue                           | UCHT1    | 300431      | Biolegend     | 2     |
| Vδ2 TCR    | FITC                                   | REA771   | 130-111-009 | Miltenyi      | 2     |
| Vδ1 TCR    | PE                                     | REA173   | 130-120-440 | Miltenyi      | 2     |
| CD4        | BV605                                  | OKT4     | 317438      | Biolegend     | 2     |
| CD8        | APC-Cy7                                | SK1      | 344746      | Biolegend     | 2     |
| PD1        | PerCP-Cy5.5                            | A17188 B | 621613      | BD Bioscience | 2     |
| Perforin   | Pe-Cy7                                 | dG9      | 308126      | Biolegend     | 2     |
| Granzyme B | AF647                                  | GB11     | 515406      | Biolegend     | 2     |
| CD45       | PE/Dazzle594                           | HI30     | 304052      | Biolegend     | 2     |
|            |                                        |          |             |               |       |
| Viability  | Live/dead Fixable Aqua dead cell stain | -        | L34957      | Invitrogen    | 3     |
| CD3        | APC                                    | UCHT1    | 300458      | Biolegend     | 3     |
| CD4        | PE-Cy7                                 | OKT4     | 317414      | Biolegend     | 3     |
| CD8        | APC-Cy7                                | SK1      | 344746      | Biolegend     | 3     |
| Vδ1 TCR    | Pacific blue                           | REA173   | 130-100-555 | Miltenyi      | 3     |
| Vδ2 TCR    | FITC                                   | REA771   | 130-111-009 | Miltenyi      | 3     |
| CD107a     | PE                                     | H4A3     | 328607      | Biolegend     | 3     |
| CTLA4      | BV605                                  | BNI3     | 369610      | Biolegend     | 3     |
| Lag3       | PE/Dazzle594                           | 11C3C6 5 | 369331      | Biolegend     | 3     |
|            |                                        |          |             |               |       |
| Viability  | Live/dead Fixable Aqua dead cell stain | -        | L34957      | Invitrogen    | 4     |
| CD45       | PE/Dazzle594                           | HI30     | 304052      | Biolegend     | 4     |
| CD45RA     | APC                                    | HI100    | 304111      | Biolegend     | 4     |
| CD3        | Pacific blue                           | UCHT1    | 300458      | Biolegend     | 4     |
| CD4        | PE-Cy7                                 | OKT4     | 317414      | Biolegend     | 4     |
| CD8        | APC-Cy7                                | SK1      | 344746      | Biolegend     | 4     |
| Vδ1 TCR    | PE                                     | REA173   | 130-120-440 | Miltenyi      | 4     |
| Vδ2 TCR    | FITC                                   | REA771   | 130-111-009 | Miltenyi      | 4     |
| CD27       | PerCP-Cy5.5                            | M-T271   | 560612      | BD Bioscience | 4     |
| NKG2D      | BV605                                  | 1D11     | 320832      | Biolegend     | 4     |

| Viability | Live-or-Dye Fixable Viability Stain | -      | 32006       | Biotium   | 5 |
|-----------|-------------------------------------|--------|-------------|-----------|---|
| CD3       | Pacific blue                        | UCHT1  | 300431      | Biolegend | 5 |
| CD4       | PE-Cy7                              | OKT4   | 317414      | Biolegend | 5 |
| CD8       | APC-Cy7                             | SK1    | 344746      | Biolegend | 5 |
| CD45      | BV605                               | HI30   | 304042      | Biolegend | 5 |
| Vδ2 TCR   | APC                                 | REA771 | 130-111-009 | Miltenyi  | 5 |
| Vδ1 TCR   | PE                                  | REA173 | 130-120-440 | Miltenyi  | 5 |
| Puromycin | AF488                               | 12D10  | MABE343     | Merck     | 5 |

115 **Table S3: Antibodies used in the flow cytometric analyses of Vδ2 T cells.**

- 120 54. M. Hirschfeld, Y. Ma, J. H. Weis, S. N. Vogel, J. J. Weis, Cutting Edge: Repurification of Lipopolysaccharide Eliminates Signaling Through Both Human and Murine Toll-Like Receptor 2. *The Journal of Immunology* **165**, 618 (2000).
55. D. Rosati *et al.*, Activation of cytokine responses by *Candida africana*. *Med Mycol* **60**, (2022).
- 125 56. P. A. Debisarun *et al.*, Induction of trained immunity by influenza vaccination - impact on COVID-19. *PLOS Pathogens* **17**, e1009928 (2021).
